# Supplementary material for: Tailoring Ti3C2Txnanosheets to tune local conductive network as an environmentally friendly material for highly efficient electromagnetic interference shielding
Source: Royal Society of Chemistry journal article supplement (doi:10.1039/c8nr10489a), 2019-01-01
Supplement: c8nr10489a1.pdf [file c8nr10489a1.pdf]

## Supporting Information

### **Tailoring $\text{Ti}_3\text{C}_2\text{T}_x$ nanosheet to tune local conductive network as an environmentally friendly material for highly efficient electromagnetic interference shielding**

Peng He,<sup>a</sup> Xi-Xi Wang,<sup>a</sup> Yong-Zhu Cai,<sup>a</sup> Jin-Cheng Shu,<sup>a</sup> Quan-Liang Zhao,<sup>b</sup> Jie Yuan<sup>c</sup> and Mao-Sheng Cao<sup>a,\*</sup>

<sup>a</sup>*School of Materials Science and Engineering, Beijing Institute of Technology, Beijing, 100081, P. R. China.*

<sup>b</sup>*School of Mechanical and Material Engineering, North China University of Technology, Beijing, 100144, China.*

<sup>c</sup>*School of Information Engineering, Minzu University of China, Beijing, 100081, China.*

\* Corresponding Authors:

Email: [caomaosheng@bit.edu.cn](mailto:caomaosheng@bit.edu.cn) (Mao-Sheng Cao).

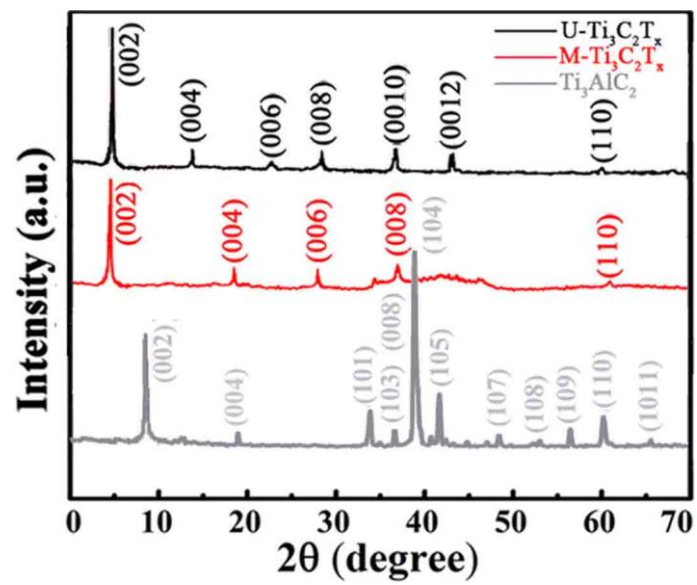

**Fig. S1** XRD patterns of M-Ti<sub>3</sub>C<sub>2</sub>T<sub>x</sub> and U-Ti<sub>3</sub>C<sub>2</sub>T<sub>x</sub> and Ti<sub>3</sub>AlC<sub>2</sub>.

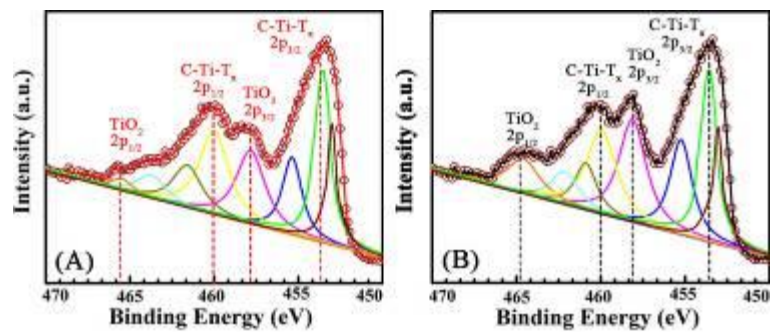

**Fig. S2** Curve fitting of XPS spectra for Ti 2p region in (A) M-Ti<sub>3</sub>C<sub>2</sub>T<sub>x</sub> and (B) U-Ti<sub>3</sub>C<sub>2</sub>T<sub>x</sub>.

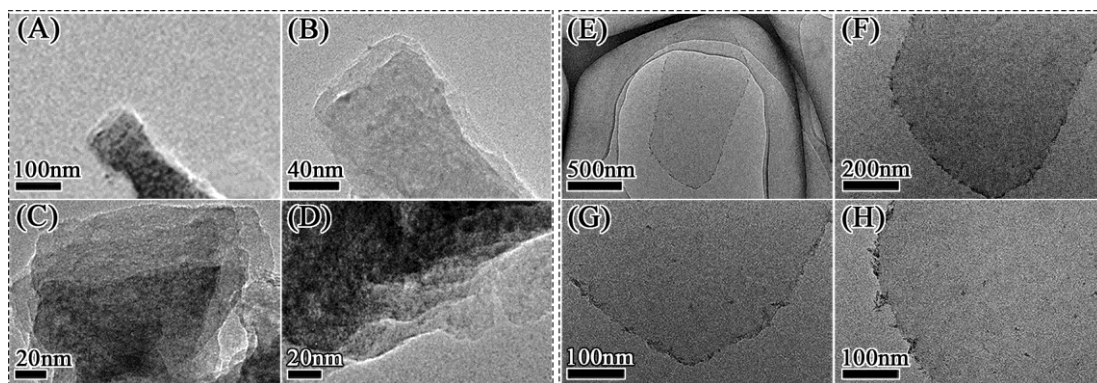

**Fig. S3** (A)-(D) TEM images of M-Ti<sub>3</sub>C<sub>2</sub>T<sub>x</sub>. (E)-(H) TEM images of U-Ti<sub>3</sub>C<sub>2</sub>T<sub>x</sub>.

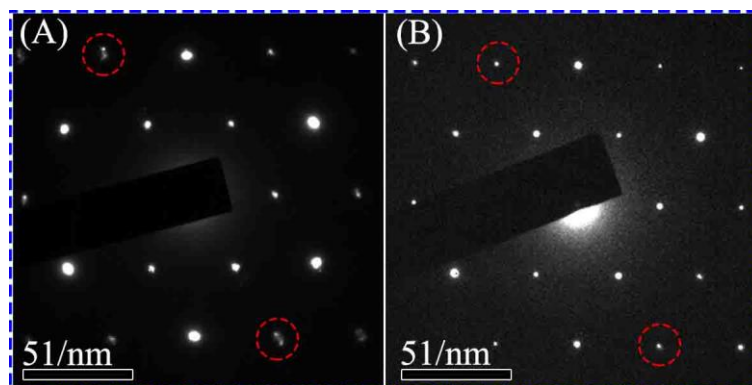

**Fig. S4** The SAED pattern of (A) M-Ti<sub>3</sub>C<sub>2</sub>T<sub>x</sub> and (B) U-Ti<sub>3</sub>C<sub>2</sub>T<sub>x</sub>.

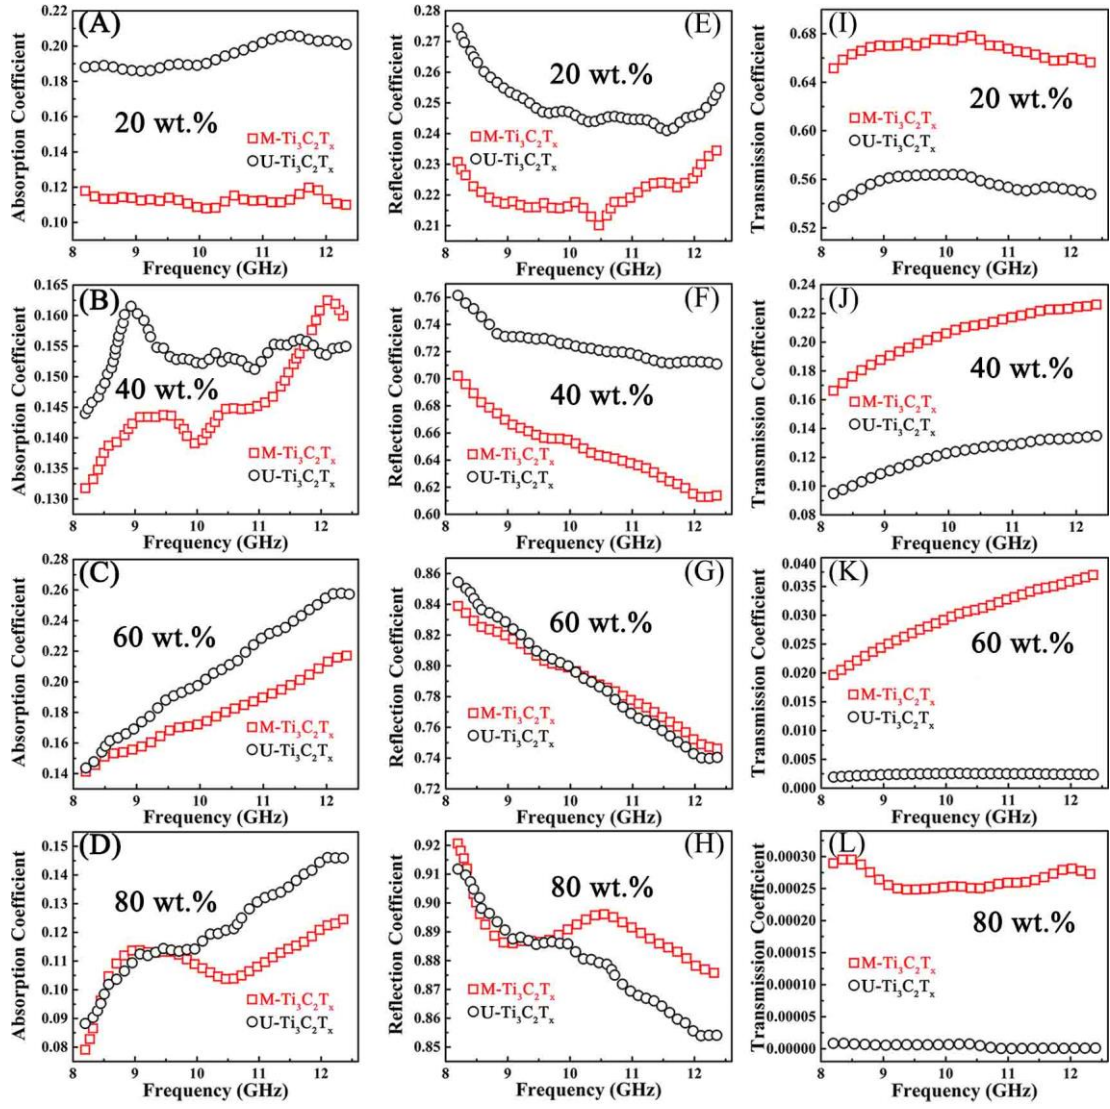

**Fig. S5** (A)-(D) Absorption comparison of the M-Ti<sub>3</sub>C<sub>2</sub>T<sub>x</sub> and U-Ti<sub>3</sub>C<sub>2</sub>T<sub>x</sub> at each mass ratio.

(E)-(H) Reflection comparison of the M-Ti<sub>3</sub>C<sub>2</sub>T<sub>x</sub> and U-Ti<sub>3</sub>C<sub>2</sub>T<sub>x</sub> at each mass ratio. (I)-(L)

Transmission comparison of the M-Ti<sub>3</sub>C<sub>2</sub>T<sub>x</sub> and U-Ti<sub>3</sub>C<sub>2</sub>T<sub>x</sub> at each mass ratio.

For revealing the SE of reflection ( $SE_R$ ) and absorption ( $SE_A$ ) in detail, the SE in dB can also be achieved by

$$SE = SE_R + SE_A \quad (1)$$

The effective absorbance ( $A_{\text{eff}}$ ) can be described as

$$A_{\text{eff}} = (1 - R - T)/(1 - R) \quad (2)$$

The reflection and effective absorption can be conveniently expressed as

$$SE_R = -10 \log(1 - R) \quad (3)$$

and

$$SE_A = -10 \log(1 - A_{\text{eff}}) = -10 \log[T/(1 - R)] \quad (4)$$

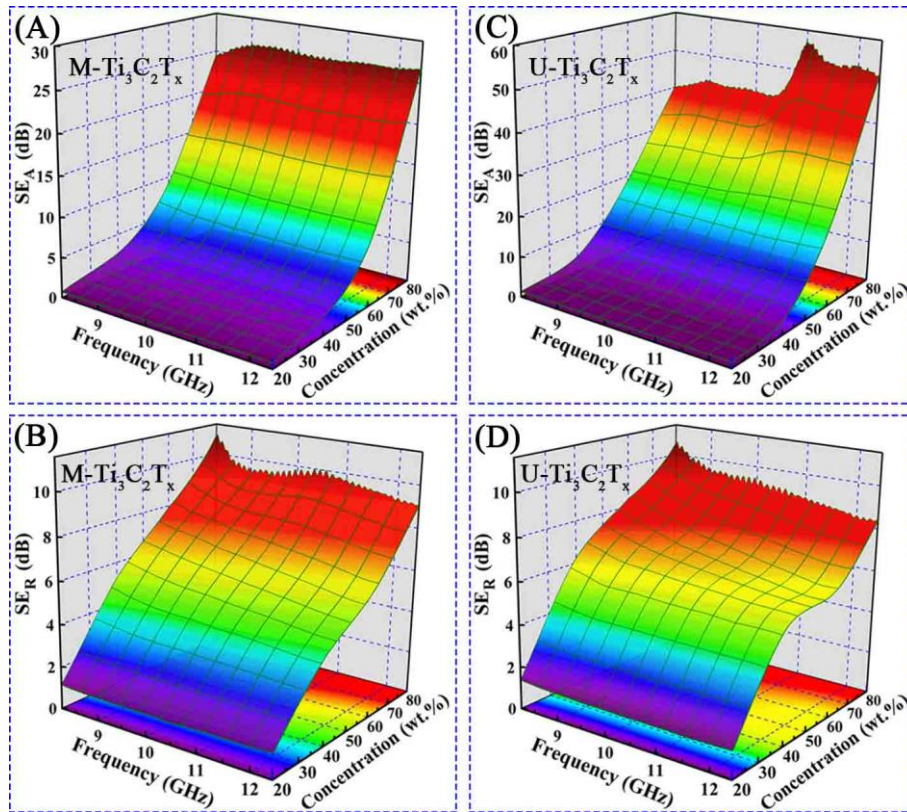

**Fig. S6** (A)  $SE_A$  and (B)  $SE_R$  of M-Ti<sub>3</sub>C<sub>2</sub>T<sub>x</sub> composites. (C)  $SE_A$  and (D)  $SE_R$  of U-Ti<sub>3</sub>C<sub>2</sub>T<sub>x</sub> composites.

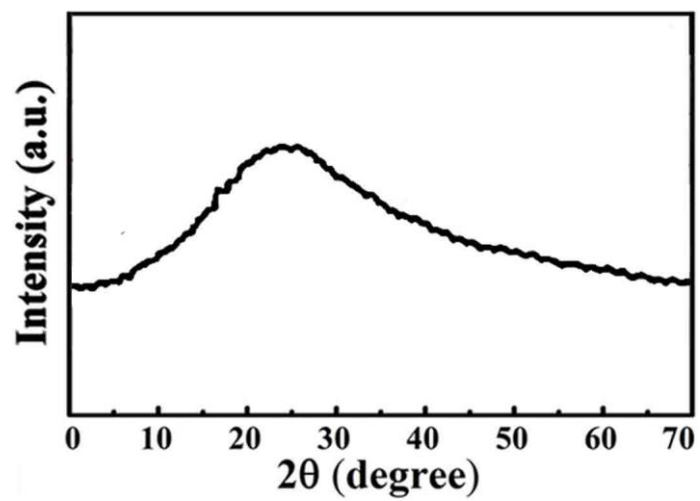

**Fig. S7** XRD pattern of SiO<sub>2</sub> nanopowders.
